# Supplementary material for: A Zn2+-responsive highly sensitive fluorescent probe and 1D coordination polymer based on a coumarin platform
Source: Royal Society of Chemistry journal article supplement (doi:10.1039/c3dt51182k), 2013-01-01

## *Electronic Supplementary Informations*

# **A Zn<sup>2+</sup> responsive highly sensitive fluorescent probe and 1D coordination polymer based on a coumarin platform**

**Virendra Kumar, Ajit Kumar, Uzra Diwan and K.K. Upadhyay\***

*Department of Chemistry (Centre of Advanced Study), Faculty of Science, Banaras Hindu University, Varanasi-221005, India*

*\*E-mail: [drkaushalbhu@yahoo.co.in](mailto:drkaushalbhu@yahoo.co.in), [kku@bhu.ac.in](mailto:kku@bhu.ac.in) ; Tel: +91 542 670 2488*

---

### **CONTENTS**

#### **1. Experimental section**

- 2. Table S1:** Crystal data and details of the structure determination of receptor **1** and receptor **1** with Zn<sup>2+</sup>
- 3. Figure S1:** IR spectrum of receptor **1**
- 4. Figure S2:** <sup>1</sup>H NMR spectrum of receptor **1**
- 5. Figure S3:** <sup>13</sup>C NMR spectrum of receptor **1**
- 6. Figure S4:** Mass spectrum of receptor **1**
- 7. Figure S5:** UV-visible Spectrum of receptor **1** with Zn<sup>2+</sup> and the color change of receptor **1** without and with Zn<sup>2+</sup>
- 8. Figure S6:** UV-visible Spectrum of receptor **1** with different metal ions at 10 μM in EtOH:H<sub>2</sub>O (1:1, v/v)
- 9. Figure S7:** Fluorescence emission spectra of receptor **1** in the presence of various metal ions
- 10. Figure S8:** Fluorescence spectrum of receptor **1** in the presence of various counter anions of Zn<sup>2+</sup>
- 11. Figure S9:** Job's Plot between receptor **1** and Zn<sup>2+</sup> showing 1:1 binding stoichiometry
- 12. Figure S10:** IR spectrum of receptor **1** with Zn<sup>2+</sup>
- 13. Figure S10:** <sup>1</sup>H NMR spectrum of receptor **1** + Zn<sup>2+</sup>
- 14. Figure S12:** Nonlinear fit plot of receptor **1** with Zn<sup>2+</sup>
- 15. Figure S13:** Detection limit and calibration curves of receptor **1** with Zn<sup>2+</sup> with a linearity range of 1.5×10<sup>-7</sup> to 4.5×10<sup>-7</sup> M

## Experimental section:

**1.1 Apparatus:** The IR Spectra for the receptor **1** and  $\text{Zn}^{2+}$  complex were recorded on JASCO-FTIR Spectrophotometer while  $^1\text{H}$  NMR spectra were recorded on JEOL AL 300 FT NMR Spectrometer. Mass spectrometric analysis was carried out on a MDS Sciex API 2000 LCMS spectrometer. Electronic spectra were recorded at room temperature (298 K) on a UV-1700 pharماسpec spectrophotometer with quartz cuvette (path length=1 cm). Emission spectra were recorded on Varian Cary Eclipse Fluorescence spectrophotometer and JY HORIBA Fluorescencespectrophotometer.

**1.2 Materials:** All reagents for synthesis were purchased from Sigma-Aldrich and were used without further purification.

**1.3 General Methods:** All titration experiments were carried at room temperature. All the cations were used as their chloride/nitrate salts. The  $^1\text{H}$  NMR spectra were recorded by using tetramethylsilane (TMS) as an internal reference standard.

**1.4. X-ray diffraction studies:** Single crystal X-ray diffraction measurements were carried out on an Oxford Diffraction Xcalibur system with a Ruby CCD detector. All the determinations of unit cell and intensity data were performed with graphite-mono-chromated Mo- $\text{K}\alpha$  radiation ( $\lambda = 0.71073 \text{ \AA}$ ). Data for the ligand and metal complex were collected at room temperature. The structures were solved by direct methods, using Fourier techniques, and refined by full-matrix least-squares on F2 using the SHELXTL-97 program package. Crystal data and details of the structure determination for ligand and complex are summarized in Table 1. CCDC **873620** and **873621** contains the supplementary crystallographic data for this paper. These data can be obtained free of charge from the Cambridge Crystallographic Data Centre via <http://www.ccdc.cam.ac.uk/cgi-bin/catreq.cgi>.

**Table S1:** Crystal data and details of the structure determination of receptor1 and receptor 1 with Zn<sup>2+</sup>

| Identification code               | RECEPTOR 1                                                                                       | 1+Zn <sup>2+</sup> COMPLEX                                                                    |
|-----------------------------------|--------------------------------------------------------------------------------------------------|-----------------------------------------------------------------------------------------------|
| CCDC No.                          | 873620                                                                                           | 873621                                                                                        |
| Empirical formula                 | C21 H22 N4 O3                                                                                    | C21 H21 N5 O6 Zn                                                                              |
| Formula weight                    | 378.43                                                                                           | 504.80                                                                                        |
| Temperature                       | 293(2) K                                                                                         | 293(2)                                                                                        |
| Wavelength                        | 0.71073 Å                                                                                        | 0.71073 Å                                                                                     |
| Crystal system                    | Monoclinic                                                                                       | Orthorhombic                                                                                  |
| space group                       | P 21                                                                                             | P 21 21 21                                                                                    |
| Unit cell dimensions              | a = 6.3154(4) Å alpha = 90°<br>b = 12.2970(7) Å beta = 97.703(7)<br>c = 12.3905(9) Å gamma = 90° | a = 12.3149(17) Å alpha = 90°<br>b = 12.7297(7) Å beta = 90°<br>c = 14.0515(11) Å gamma = 90° |
| Volume                            | 953.57(11) Å <sup>3</sup>                                                                        | 2202.8(4) Å <sup>3</sup>                                                                      |
| Z                                 | 2                                                                                                | 4                                                                                             |
| Density (calculated)              | 1.318 mg/m <sup>-3</sup>                                                                         | 1.522 mg/m <sup>-3</sup>                                                                      |
| Absorption coefficient            | 0.090 mm <sup>-1</sup>                                                                           | 1.164 mm <sup>-1</sup>                                                                        |
| F(000)                            | 400                                                                                              | 1040                                                                                          |
| Crystal size                      | 0.40 x 0.20 x 0.20 mm                                                                            | 0.32 x 0.24 x 0.22 mm                                                                         |
| Crystal color and habit           | Red and Rectangular                                                                              | Red and Rectangular                                                                           |
| Diffractometer                    | 'Xcalibur, Eos                                                                                   | 'Xcalibur, Eos                                                                                |
| Theta range for data collection   | 3.26 to 28.90 deg.                                                                               | 3.20 to 32.50 deg                                                                             |
| Limiting indices                  | -8<=h<=8, -15<=k<=9, -6<=l<=11                                                                   | -17<=h<=5, -19<=k<=18, -21<=l<=                                                               |
| Reflections collected / unique    | 4028 / 3058 [R(int)= 0.0199]                                                                     | 9340 / 6068 [R(int) = 0.0621]                                                                 |
| Completeness to theta = 25.00     | 99.9 %                                                                                           | 99.8 %                                                                                        |
| Absorption correction             | Semi-empirical from equivalents                                                                  | Semi-empirical from equivalents                                                               |
| Max. and min. transmission        |                                                                                                  | 1.00000 and 0.86938                                                                           |
| Refinement method                 | Full-matrix least-squares on F <sup>2</sup>                                                      | Full-matrix least-squares on F <sup>2</sup>                                                   |
| Data / restraints / parameters    | 3058 / 1 / 256                                                                                   | 6068 / 0 / 301                                                                                |
| Goodness-of-fit on F <sup>2</sup> | 1.028                                                                                            | 0.894                                                                                         |
| Final R indices [I>2sigma(I)]     | R1 = 0.0546, wR2 = 0.1123                                                                        | R1 = 0.0566, wR2 = 0.0626                                                                     |
| R indices (all data)              | R1 = 0.0937, wR2 = 0.1340                                                                        | R1 = 0.1218, wR2 = 0.0816                                                                     |
| Absolute structure parameter      | 2.8(18)                                                                                          | 0.001(15)                                                                                     |
| Largest diff. peak and hole       | 0.270 and -0.239 e. Å <sup>-3</sup>                                                              | 0.630 and -0.566 e. Å <sup>-3</sup>                                                           |

**Figure S1:** IR spectrum of receptor 1

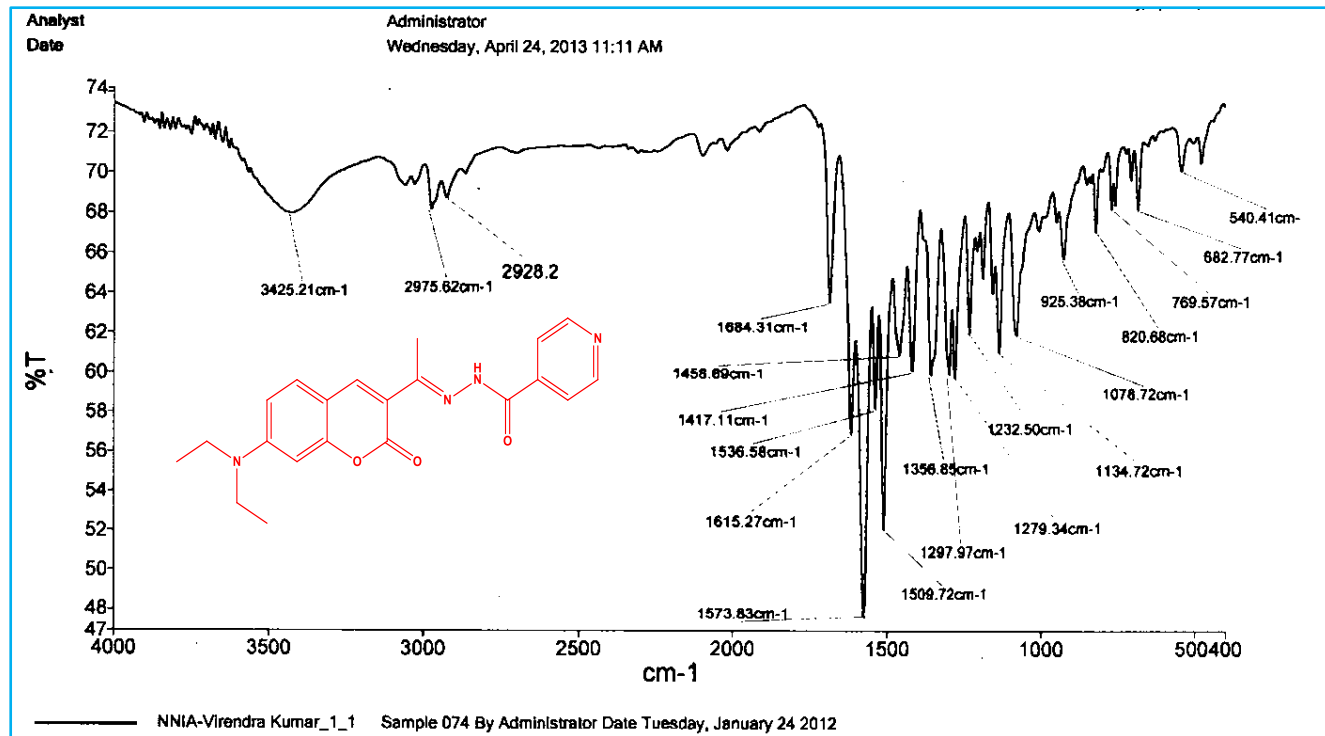

**Figure S2:**  $^1\text{H}$  NMR spectrum of receptor 1

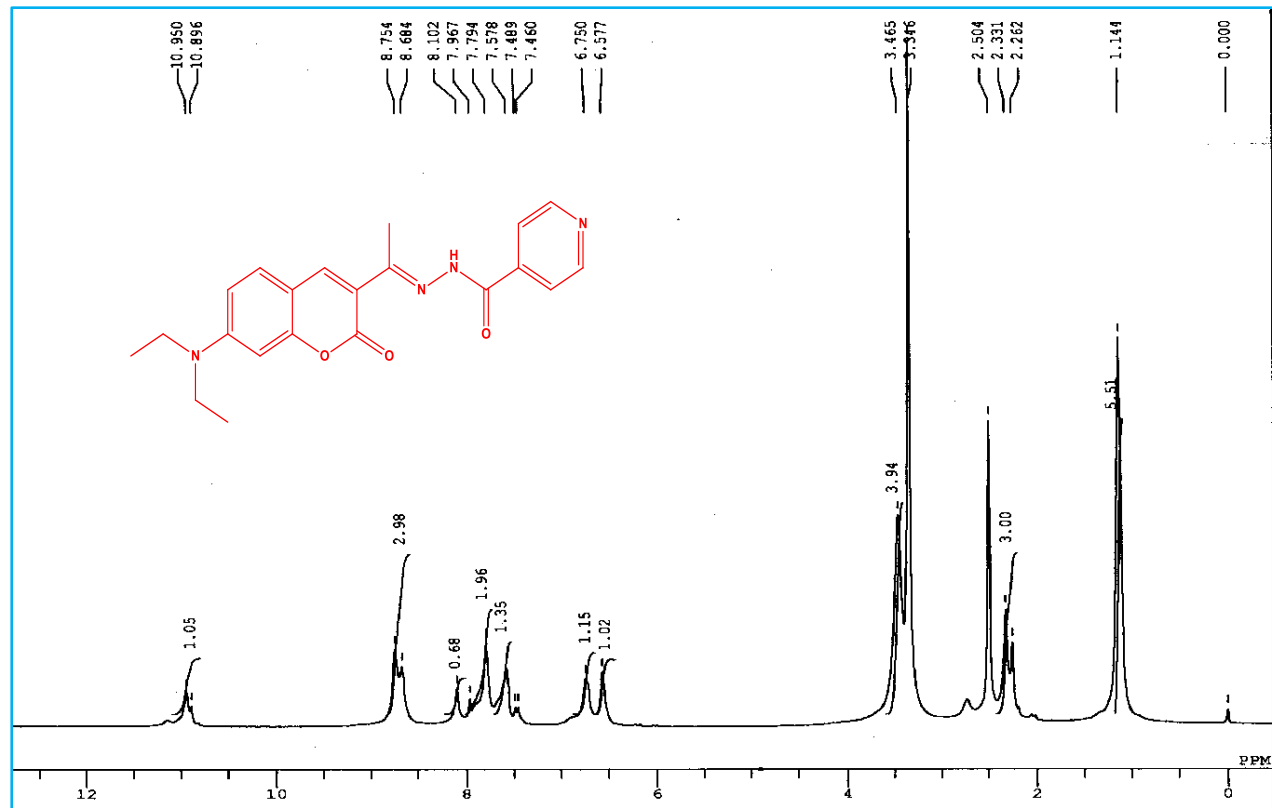

**Figure S3:**  $^{13}\text{C}$  NMR spectrum of receptor 1

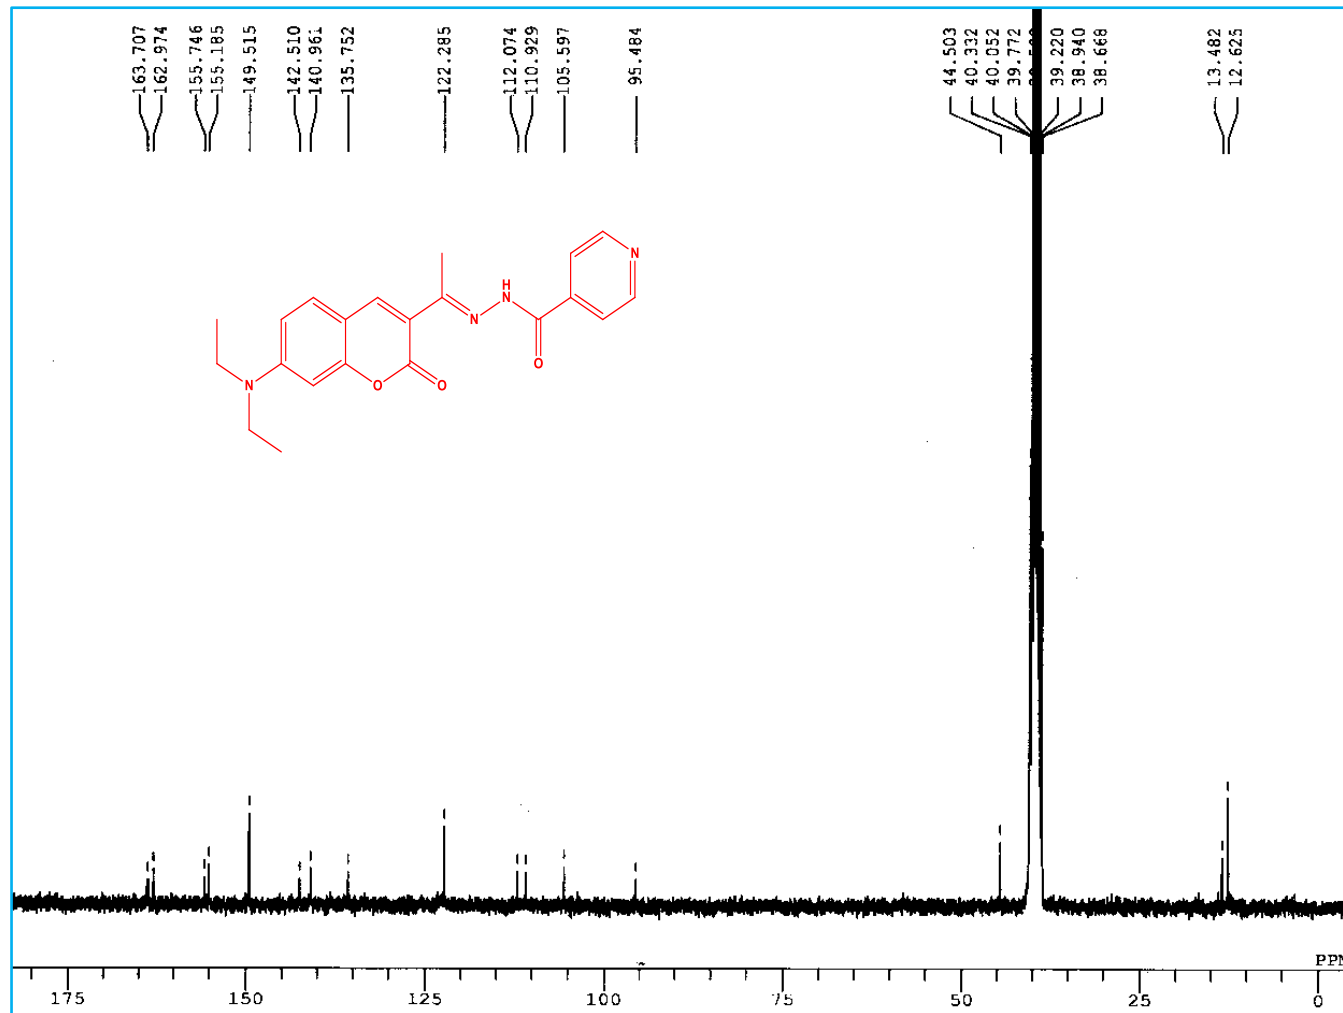

Figure S4: Mass spectrum of receptor 1

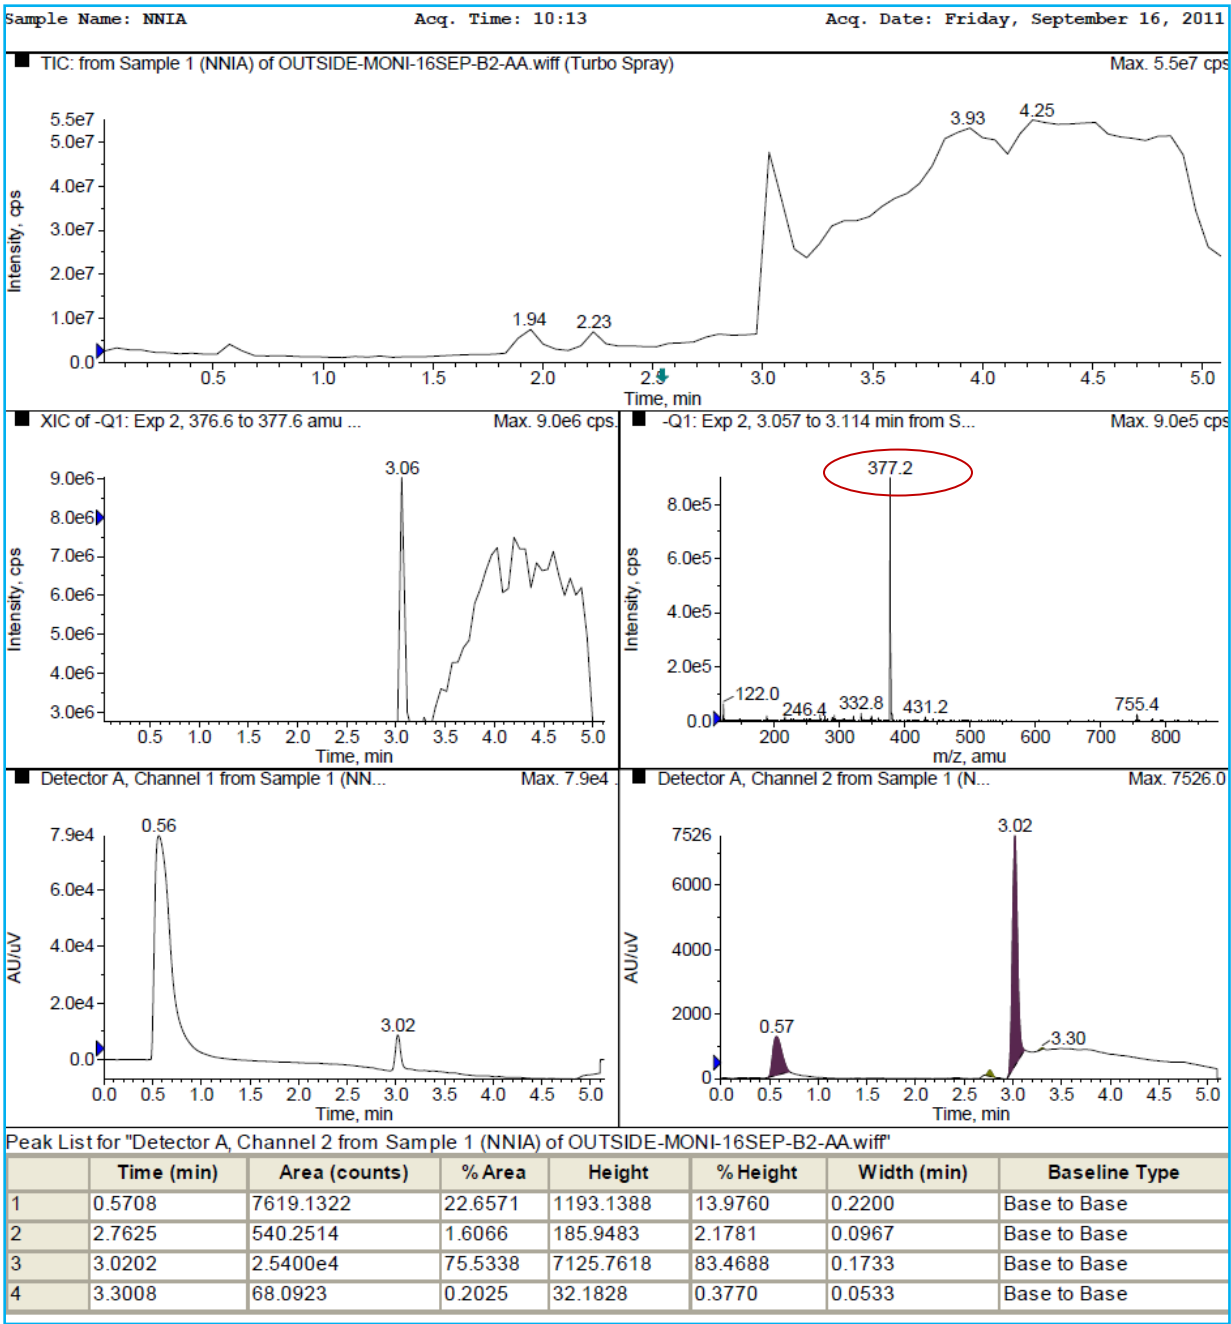

**Figure S5:** UV-visible Spectrum of receptor **1** with  $\text{Zn}^{2+}$  and the color change of receptor **1** without and with  $\text{Zn}^{2+}$

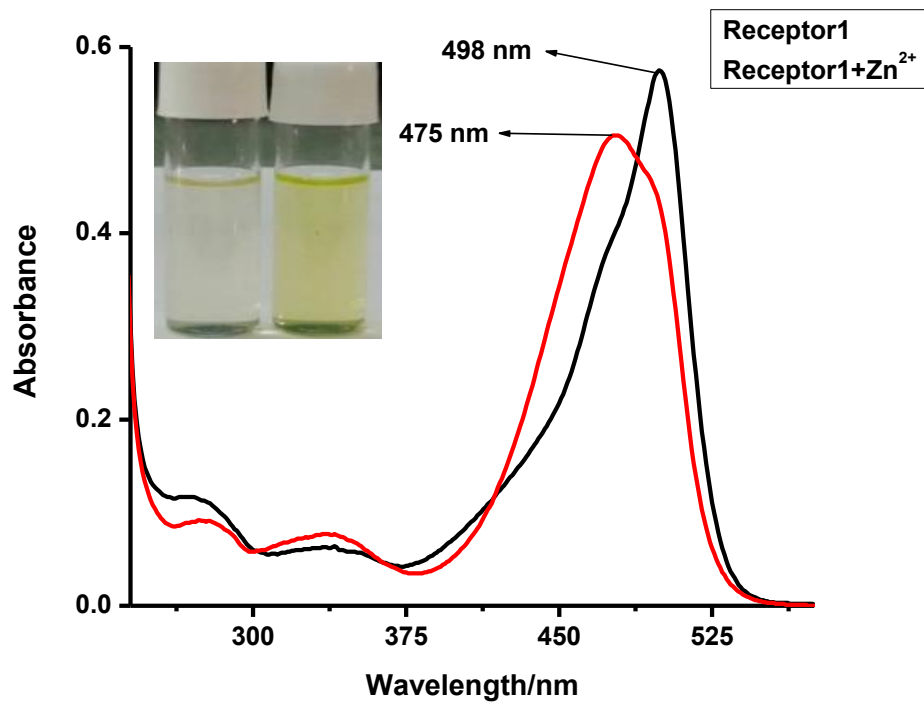

**Figure S6:** UV-visible Spectrum of receptor **1** with different metal ions at 10  $\mu\text{M}$  in EtOH:H<sub>2</sub>O (1:1, v/v)

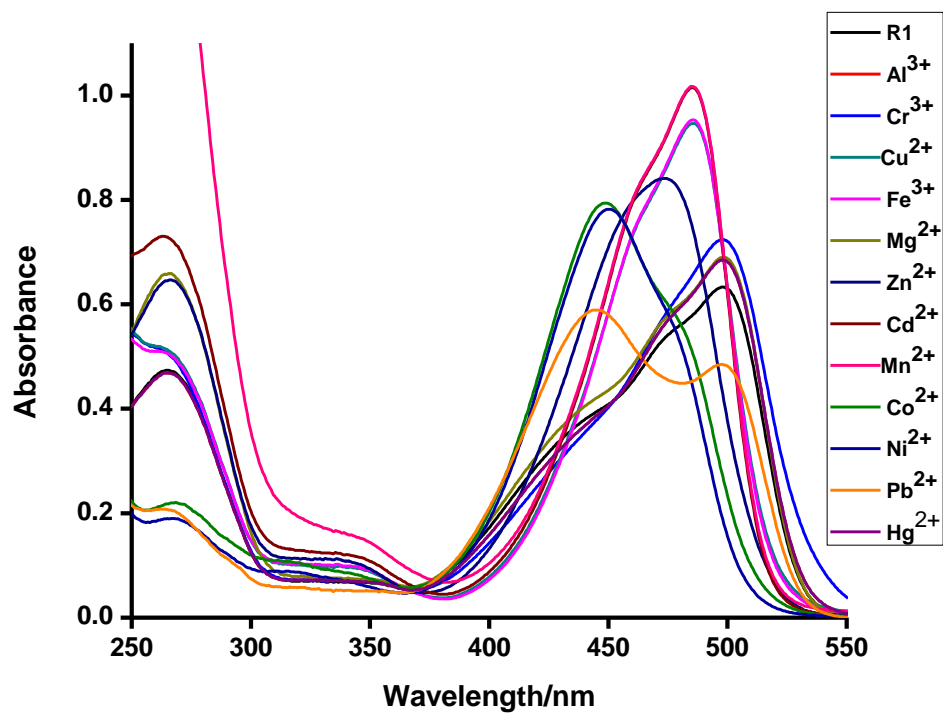

**Figure S7:** Fluorescence emission spectra of receptor **1** in the presence of various metal ions

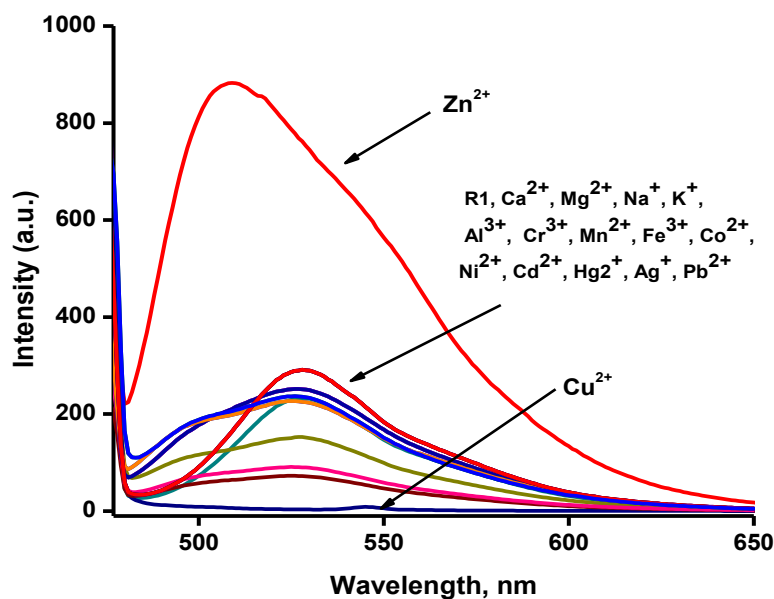

**Figure S8:** Fluorescence spectrum of receptor **1** in the presence of various counter anions of  $\text{Zn}^{2+}$

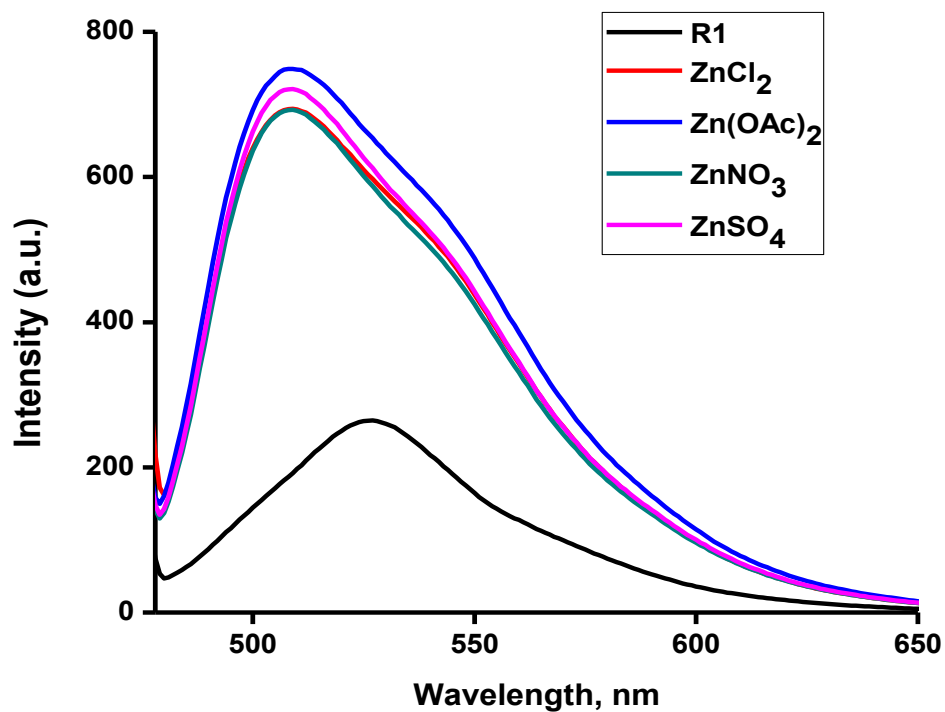

**Figure S9:** Job's Plot between receptor **1** and  $\text{Zn}^{2+}$  showing 1:1 binding stoichiometry

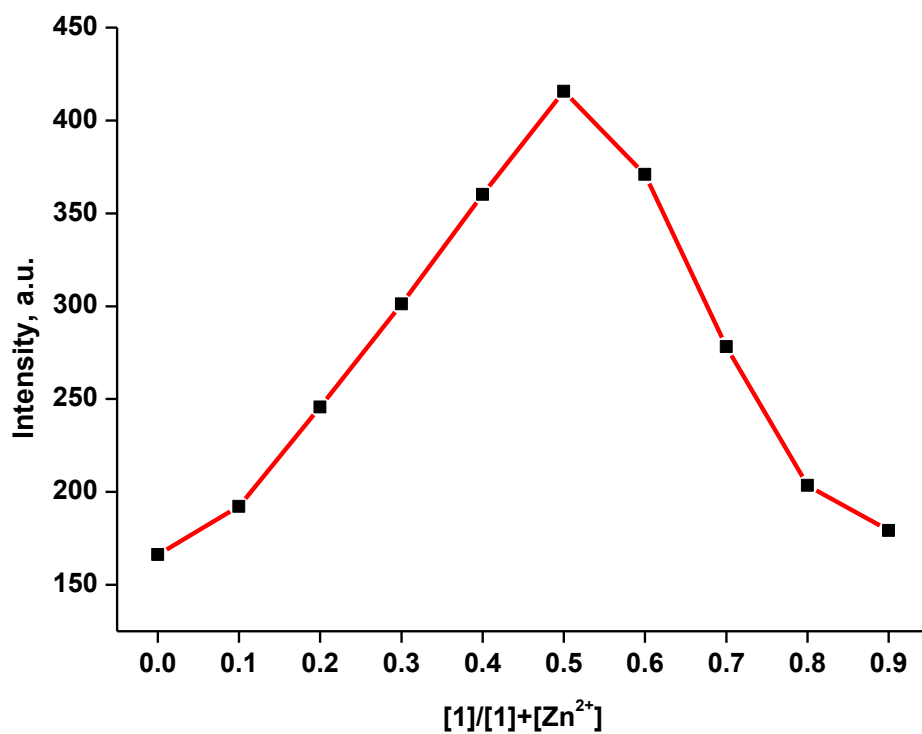

**Figure S10:** IR spectrum of receptor **1** with  $\text{Zn}^{2+}$

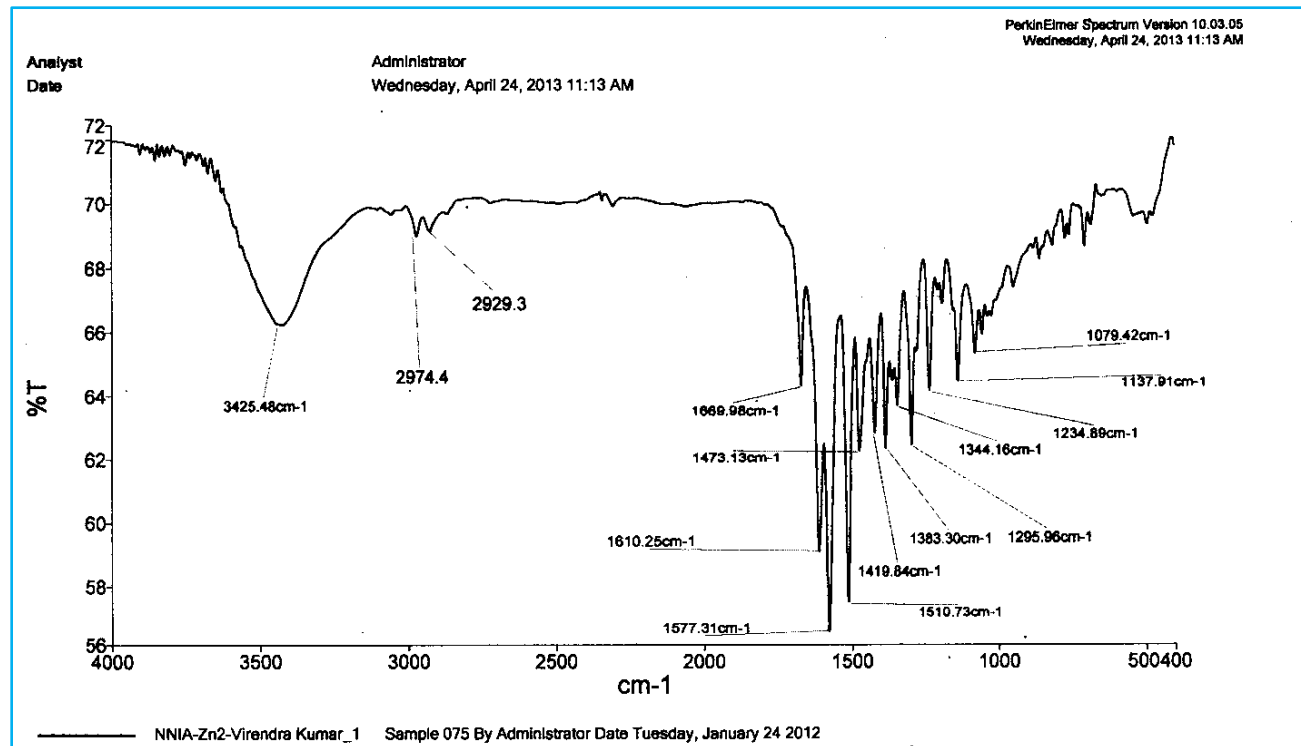

**Figure S11:**  $^1\text{H}$  NMR spectrum of receptor **1** +  $\text{Zn}^{2+}$

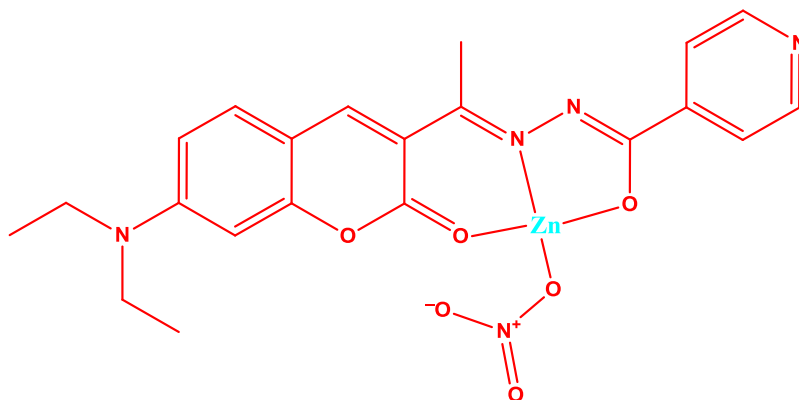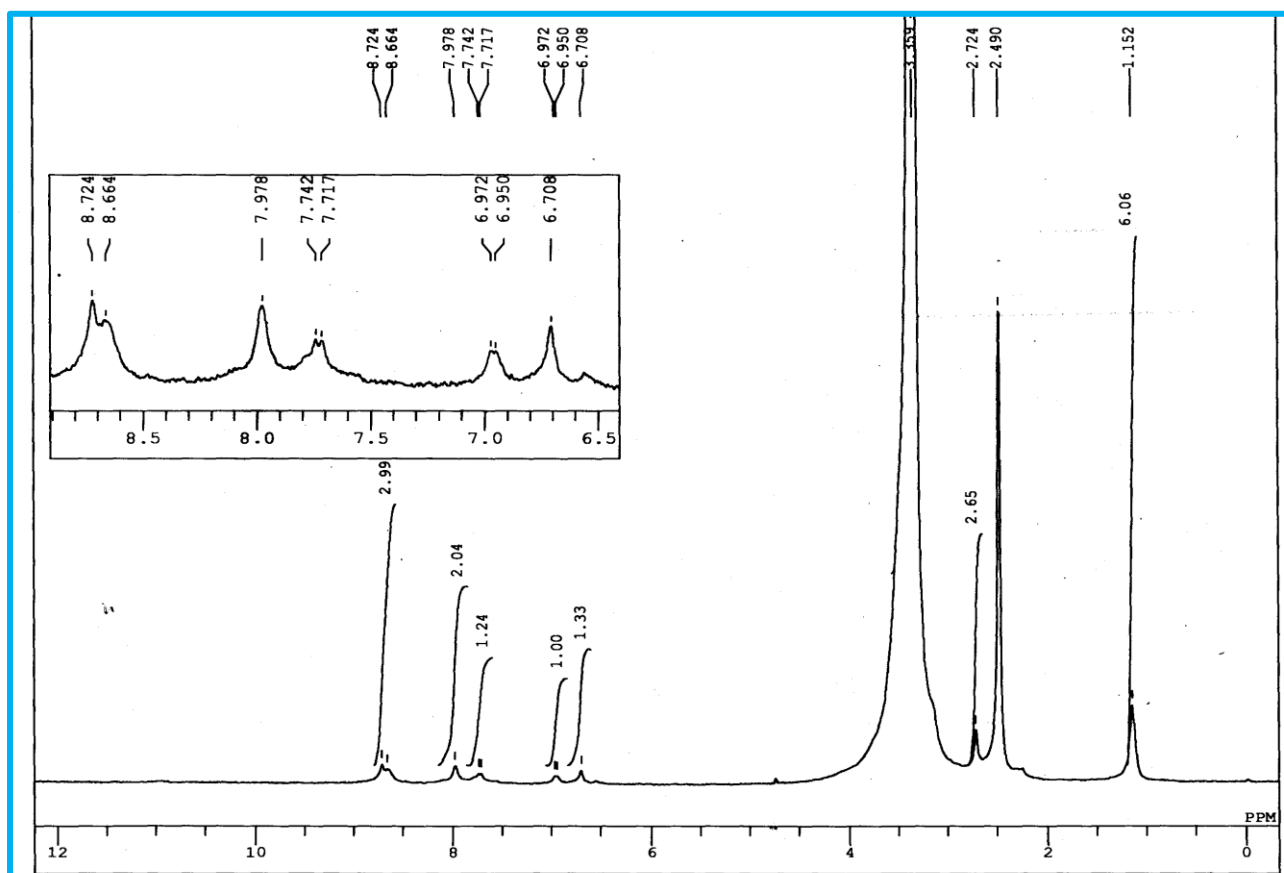

**Figure S12:** Nonlinear fit plot of receptor **1** with  $\text{Zn}^{2+}$

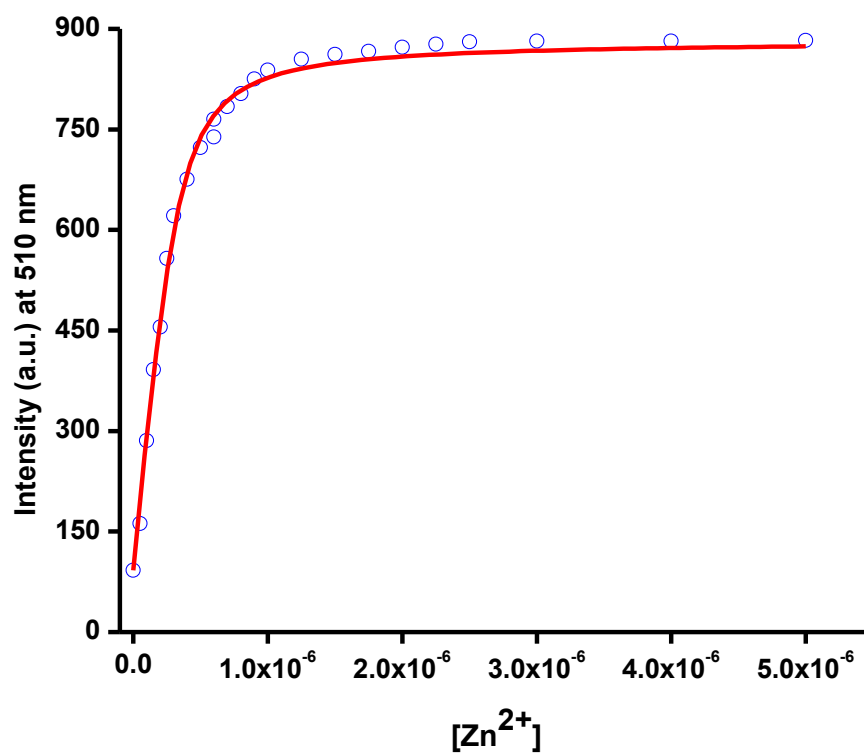

**Figure S13:** Detection limit and calibration curves of receptor **1** with  $\text{Zn}^{2+}$  with a linearity range of  $1.5 \times 10^{-7}$  to  $4.5 \times 10^{-7}$  M

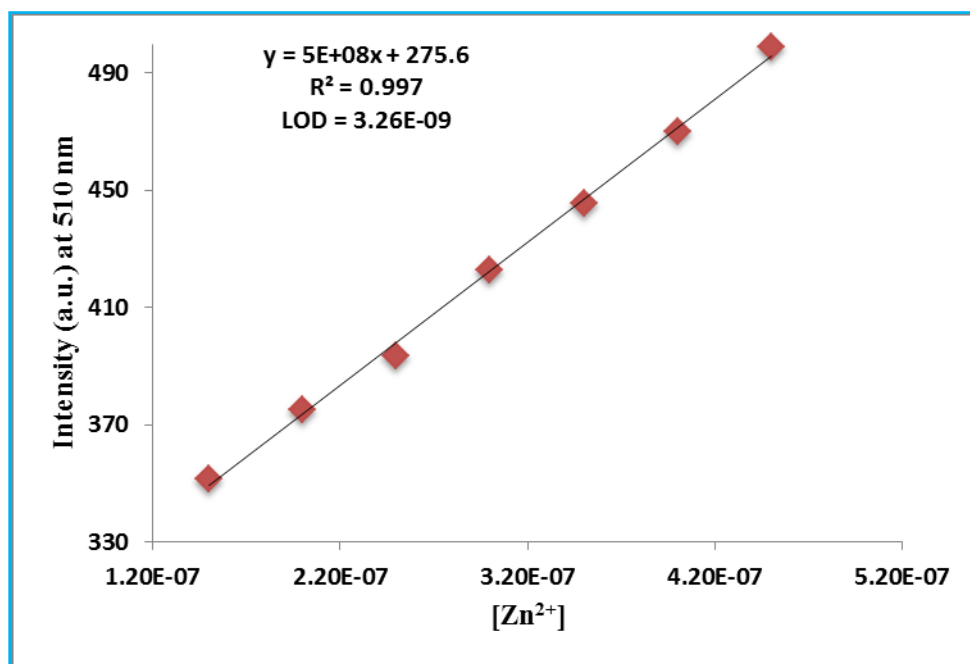

Supplement: c3dt51182k.pdf [file c3dt51182k.pdf]
